# Supplementary material for: Controllable Electrically Guided Nano-Al/MoO3 Energetic-Film Formation on a Semiconductor Bridge with High Reactivity and Combustion Performance
Source: PubMed Central journal article supplement (PMC7279552; doi:10.3390/nano10050955), 2020-05-18
Supplement: nanomaterials-10-00955-s001.pdf [file nanomaterials-10-00955-s001.pdf]

Supporting Information

for

**Controllable electrically guided nano-Al/MoO<sub>3</sub>  
energetic-film formation on a semiconductor bridge  
with high reactivity and combustion performance**

Xiaogang Guo <sup>1,2</sup>, Qi Sun <sup>3,\*</sup>, Taotao Liang <sup>4</sup> and A. S. Giwa<sup>5</sup>

<sup>1</sup> Chongqing Key Laboratory of Inorganic Special Functional Materials, College of Chemistry and Chemical Engineering, Yangtze Normal University, Chongqing 408100, China;  
guoxiaogang@yznu.edu.cn

<sup>2</sup> Material Corrosion and Protection Key Laboratory of Sichuan Province, College of Chemistry and Environmental Engineering, Institute of Functional Materials, Sichuan University of Science and Engineering, Zigong 643000, China

<sup>3</sup> College of Life Sciences, Chongqing Normal University, Chongqing 401331, China

<sup>4</sup> Faculty of Materials and Energy, Southwest University, Chongqing 400715, China;  
liangtaotao@email.swu.edu.cn

<sup>5</sup> State Key Joint Laboratory of Environment Simulation and Pollution Control, School of Environment, Tsinghua University, Beijing 100084, China; NasirA@tsinghuamail.edu.cn

\* Correspondence: sunqi2017@cqnu.edu.cn

\*Corresponding author E-mail: sunqi2017@cqnu.edu.cn (Q. Sun)

## EPD dynamic research

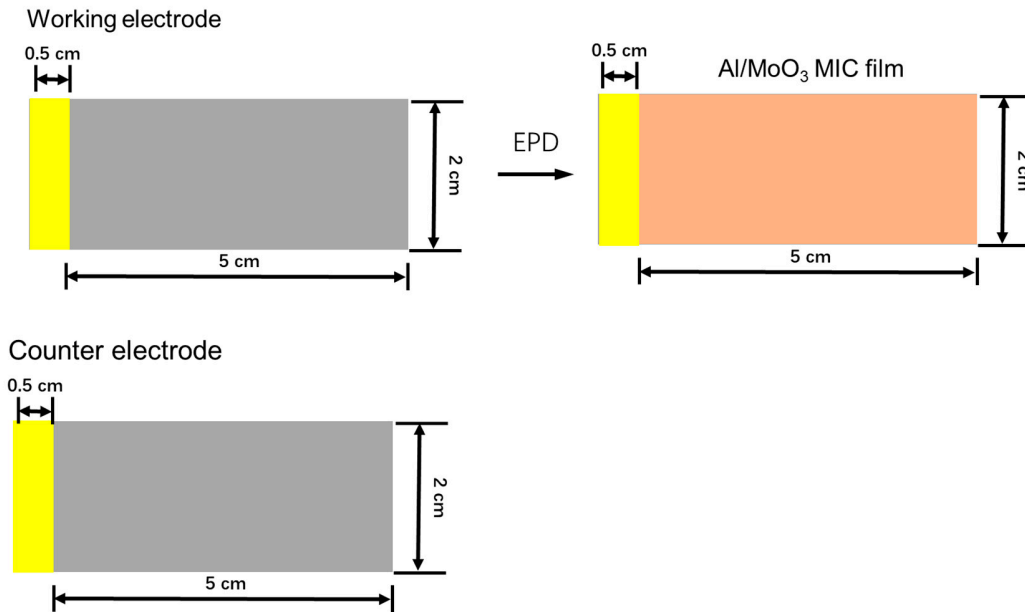

## Ignition test

Working electrode:

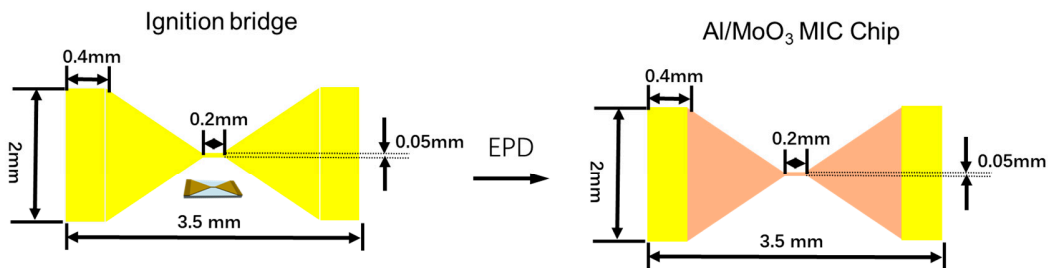

Counter electrode:

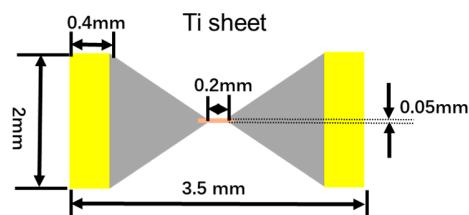

**Figure S1.** The size specification of the working and counter electrodes used for EPD dynamic research and ignition test. All yellow rectangle zones are parts of electrodes without touching the optimized suspension.

**Table S1.** Molar content results of different elements in products by EDX and AAS analysis in three random regions.

| Elements  | Molar content (%) |          |          |               |               |          |          |               |
|-----------|-------------------|----------|----------|---------------|---------------|----------|----------|---------------|
|           | EDX analysis      |          |          |               | AAS analysis  |          |          |               |
|           | Region 1          | Region 2 | Region 3 | Average value | Region 1      | Region 2 | Region 3 | Average value |
| <b>Al</b> | ~33.6%            | ~33.9%   | ~33.2%   | ~33.7%        | ~34.2%        | ~34.0%   | ~33.6%   | ~33.9%        |
| <b>Mo</b> | ~16%              | ~16.2%   | ~15.7%   | ~16%          | ~15.6%        | ~15.3%   | ~16.1%   | ~15.7%        |
| <b>O</b>  | ~50%              | ~49%     | ~51%     | ~50%          | ~50.2%        | ~50.7%   | ~49.4%   | ~50.4%        |
|           | Al:Mo:O≈2:1:3     |          |          |               | Al:Mo:O≈2:1:3 |          |          |               |
